# Supplementary material
Source: HighWire-hosted journal article supplement (https://www.ajevonline.org/highwire/filestream/11452/field_highwire_adjunct_files/0/Supplemental_Data.pdf)
Supplement: Supplemental_Data.pdf [file Supplemental_Data.pdf]

**Supplemental Data for:**

Tello J, Herzog K, Rist F, This P and Doligez A. 2020.

Automatic flower number evaluation in grapevine inflorescences using RGB images.

Am J Enol Vitic 71:10-16. doi: 10.5344/ajev.2019.19036.

**Supplemental Material**

**Supplemental Figure 1** Histograms showing the phenotypic distribution of three cluster traits (weight, length, and compactness) in three grapevine segregating populations (popMtp3331, popMtp3332, and popMtp3335) in 2013, 2014, and 2015. Grapevine genotypes selected in this work are shown in red. Discarded genotypes are shown in gray. Cluster compactness was evaluated according to the CI-12 quantitative metric proposed by Tello and Ibáñez (2014).

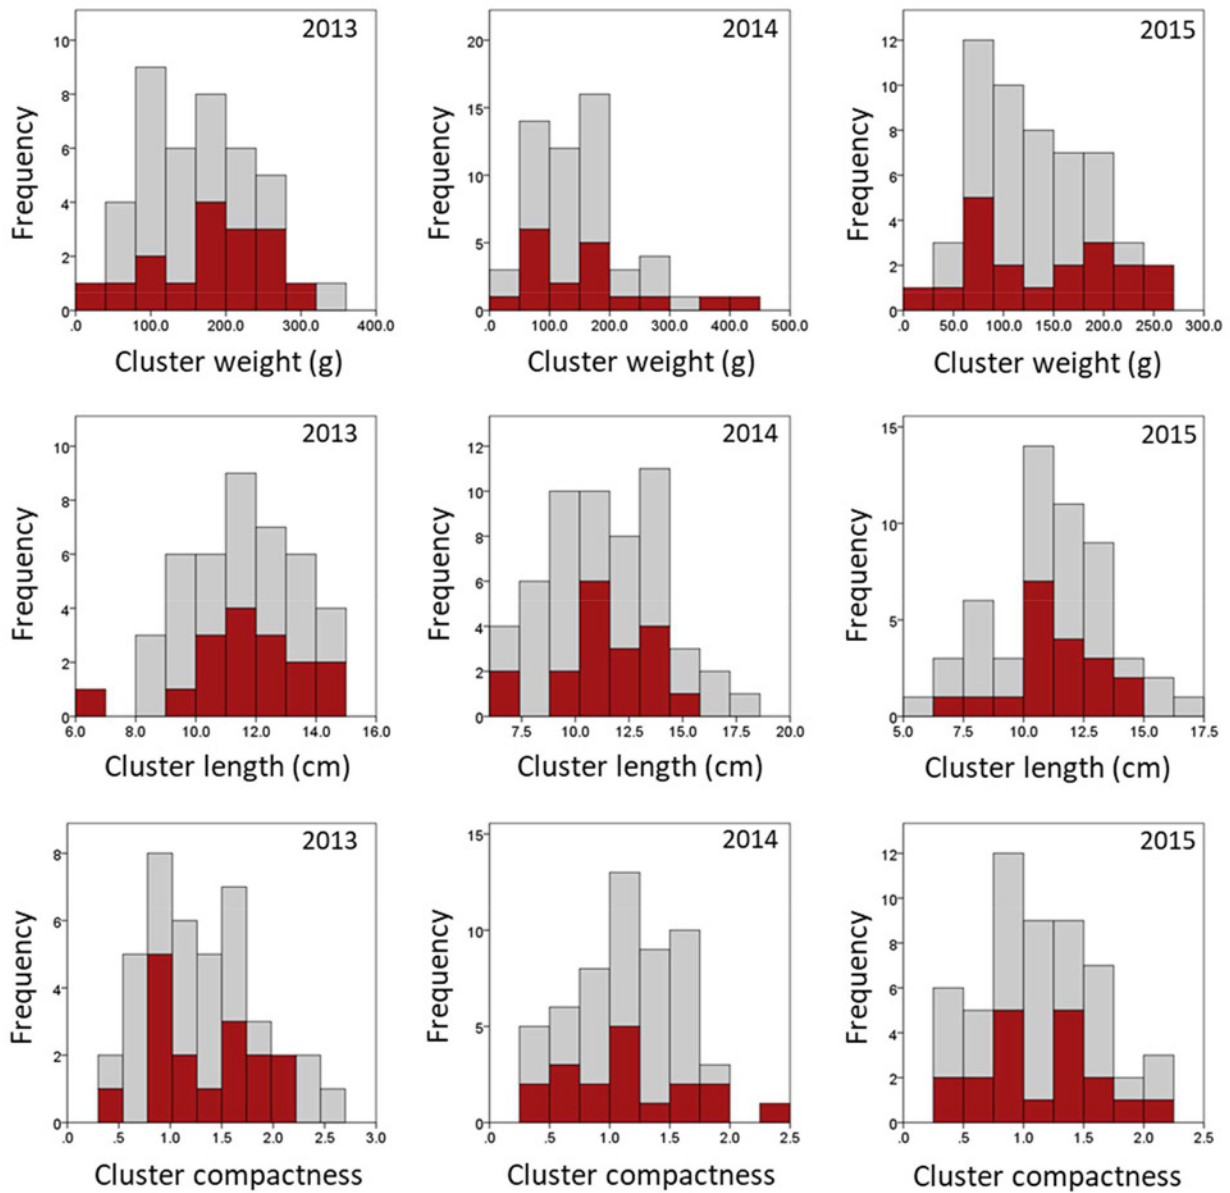

1. popMtp3331 (Syrah x Pinot noir)

**Supplemental Data for:**

Tello J, Herzog K, Rist F, This P and Doligez A. 2020.

Automatic flower number evaluation in grapevine inflorescences using RGB images.

Am J Enol Vitic 71:10-16. doi: 10.5344/ajev.2019.19036.

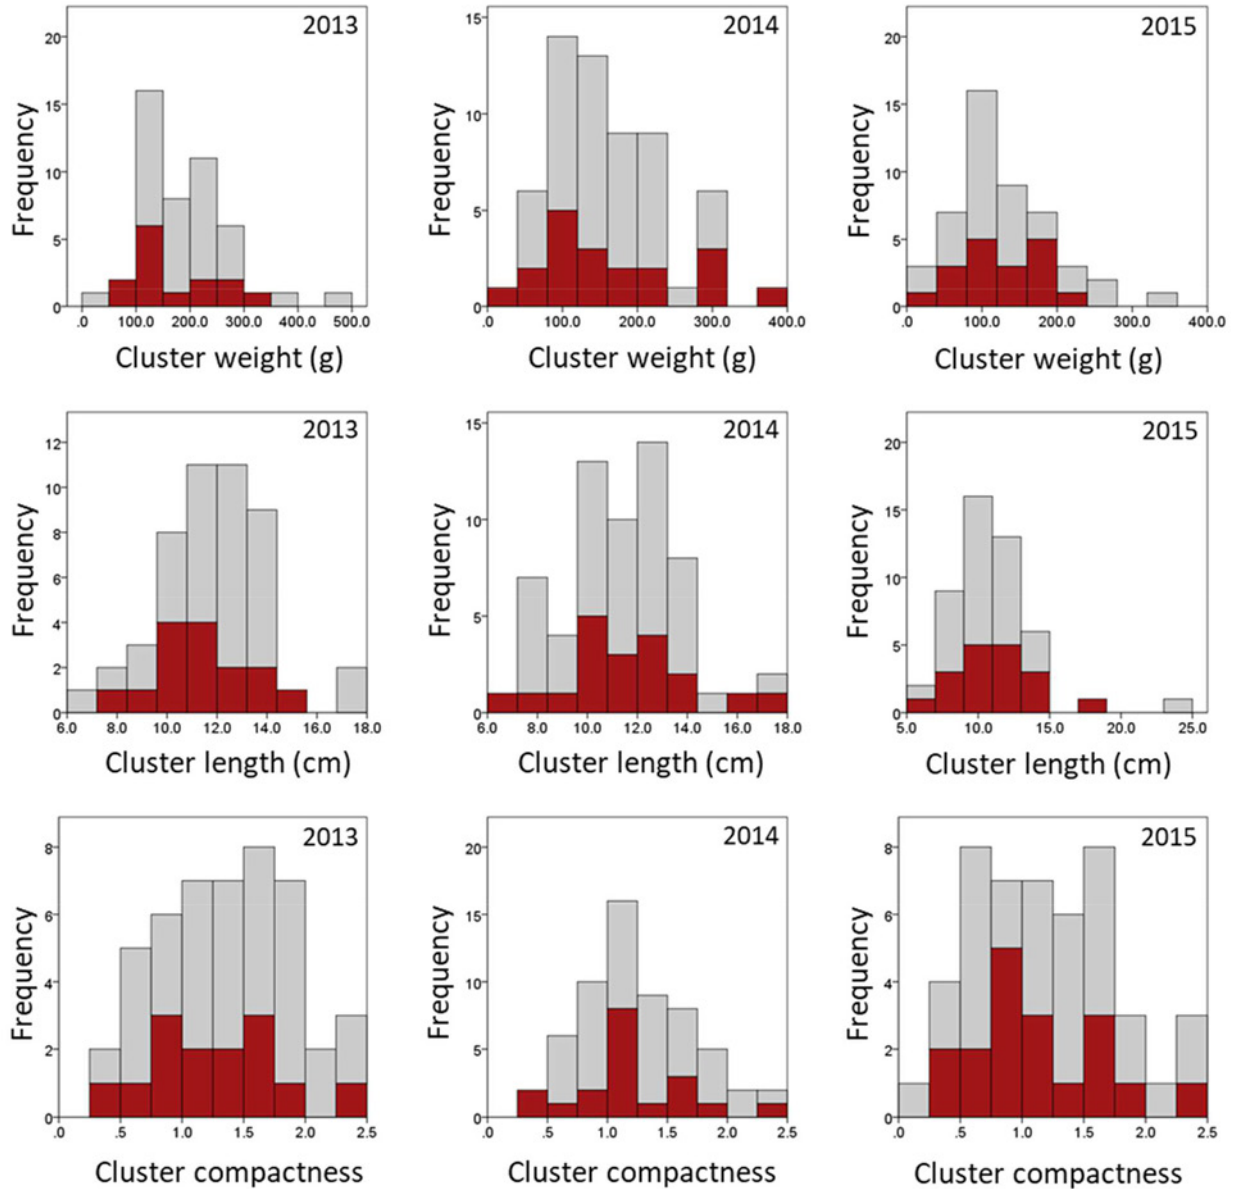

2. popMtp3332 (Cabernet Sauvignon x Pinot noir)

**Supplemental Data for:**

Tello J, Herzog K, Rist F, This P and Doligez A. 2020.

Automatic flower number evaluation in grapevine inflorescences using RGB images.

Am J Enol Vitic 71:10-16. doi: 10.5344/ajev.2019.19036.

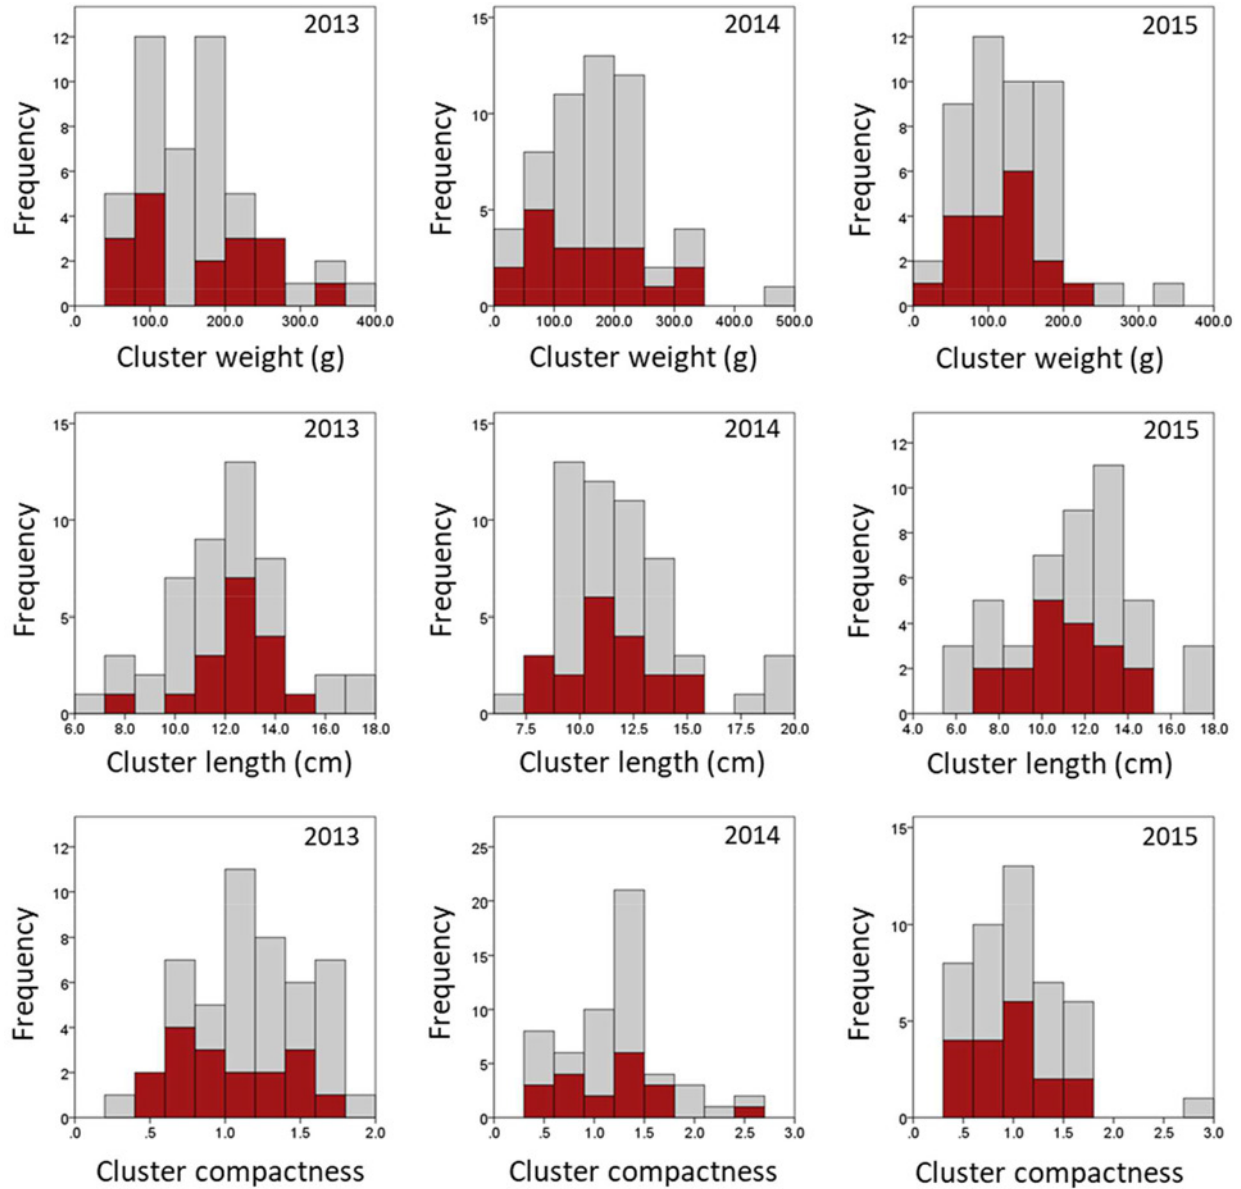

3. popMtp3335 (Cabernet Sauvignon x Syrah)

Tello J and Ibáñez J. 2014. Evaluation of indexes for the quantitative and objective estimation of grapevine bunch compactness. *Vitis* 53:9-16.
